# Supplementary material for: Quantifying connectivity between local Plasmodium falciparum malaria parasite populations using identity by descent
Source: PubMed Central journal article supplement (PMC5678785; doi:10.1371/journal.pgen.1007065), 2017-10-27
Supplement: pgen.1007065.s001.pdf [file pgen.1007065.s001.pdf]

| Correlate                                                                                                               | Expectation <sup>†</sup> | Observation                                                                                                               |
|-------------------------------------------------------------------------------------------------------------------------|--------------------------|---------------------------------------------------------------------------------------------------------------------------|
| Percentage of multiple-genotype infections (samples with >5% het calls)                                                 | Decline                  | Statistically significant decline from 63-14% from 2000-2010 (Figure 3)                                                   |
| Number of heteroallelic calls per multiple-genotype infection                                                           | Decline                  | Statistically significant decline with year, from 31-20 from 2001-2010 (Figure 4)                                         |
| Probability of sampling identical MLGs within 14 days in 2001-2004 (t1) versus 2007-2010 (t2)                           | Increase                 | Increased (Figure 5c)                                                                                                     |
| Genotypic richness, $R$ (proportion of unique genotypes, measured by the number of distinct MLG divided by sample size) | Decline                  | Significant decline from 0.94-0.71 from t1 to t2 in both Mawker Thai and Maela (Figure 7b)                                |
| Slope, $\beta$ , of the MLG frequency distribution in t1 versus t2                                                      | Decline                  | Significant decline from 3.39-1.37 from t1 to t2 in both Mawker Thai and Maela (Figure 7c)                                |
| Multilocus linkage disequilibrium, $I_{AS}$ , in t1 versus t2 with and without repeated MLGs                            | Increase                 | Increased significantly from 0.0040 to 0.0109 from t1 to t2 in Mawker Thai but not Maela (0.0024 to 0.0025 from t1 to t2) |
| Genetic diversity (Nei's expected heterozygosity index, $H_E$ )                                                         | Decrease                 | No change (0.427 to 0.429 from t1 to t2)                                                                                  |
| $F_{ST}$ between Maela and Mawker Thai using Weir & Cockerham estimator                                                 | Increase                 | Insignificant increase from 0.007 to 0.013 from t1 to t2                                                                  |
| Short-term variance effective population size, $N_eV$ , as a measure of effective population size                       | Decrease                 | Increased or remained stable depending on estimator (582 to $\infty$ using MLNE, 43 to 328 using estimator of moments)    |
