# Supplementary material for: Quantifying connectivity between local Plasmodium falciparum malaria parasite populations using identity by descent
Source: PubMed Central journal article supplement (PMC5678785; doi:10.1371/journal.pgen.1007065), 2017-10-27
Supplement: pgen.1007065.s002.pdf [file pgen.1007065.s002.pdf]

| Clinic | 2001 | 2002 | 2003 | 2004 | 2005 | 2006 | 2007 | 2008 | 2009 | 2010 | Total |
|--------|------|------|------|------|------|------|------|------|------|------|-------|
| MLA    | 17   | 39   | 35   | 28   | 2    | 0    | 5    | 37   | 26   | 23   | 212   |
| WPA    | 0    | 0    | 0    | 12   | 0    | 0    | 20   | 228  | 120  | 77   | 457   |
| MKK    | 0    | 0    | 0    | 0    | 0    | 0    | 4    | 57   | 40   | 15   | 116   |
| MKT    | 12   | 58   | 67   | 22   | 19   | 12   | 3    | 88   | 70   | 37   | 388   |
| Total  | 29   | 97   | 102  | 62   | 21   | 12   | 32   | 410  | 256  | 152  | 1173  |
