# Supplementary material for: Quantifying connectivity between local Plasmodium falciparum malaria parasite populations using identity by descent
Source: PubMed Central journal article supplement (PMC5678785; doi:10.1371/journal.pgen.1007065), 2017-10-27
Supplement: pgen.1007065.s003.pdf [file pgen.1007065.s003.pdf]

| Clinic | 2001-2004 | 2008 | 2011-2012 | 2014 | Total |
|--------|-----------|------|-----------|------|-------|
| MLA    | 33        | 12   | 2         | 8    | 55    |
| WPA    | 3         | 36   | 48        | 16   | 103   |
| MKK    | 0         | 0    | 0         | 4    | 4     |
| MKT    | 0         | 0    | 0         | 16   | 16    |
| Total  | 36        | 48   | 50        | 44   | 178   |
