# Supplementary material for: Quantifying connectivity between local Plasmodium falciparum malaria parasite populations using identity by descent
Source: PubMed Central journal article supplement (PMC5678785; doi:10.1371/journal.pgen.1007065), 2017-10-27
Supplement: pgen.1007065.s004.pdf [file pgen.1007065.s004.pdf]

|                         | Before Bonferroni correction |             | After Bonferroni correction |        |
|-------------------------|------------------------------|-------------|-----------------------------|--------|
|                         | Clinic                       | Year        | Clinic                      | Year   |
| Single-genotype barcode | 11 (11.83%)                  | 9 (9.68%)   | 0 (0%)                      | 0 (0%) |
| WGS                     | 2326 (6.66%)                 | 945 (2.70%) | 4.58 (1.31%)                | 0 (0%) |
