# Supplementary material for: Quantifying connectivity between local Plasmodium falciparum malaria parasite populations using identity by descent
Source: PubMed Central journal article supplement (PMC5678785; doi:10.1371/journal.pgen.1007065), 2017-10-27
Supplement: pgen.1007065.s008.pdf [file pgen.1007065.s008.pdf]

# S4 Text

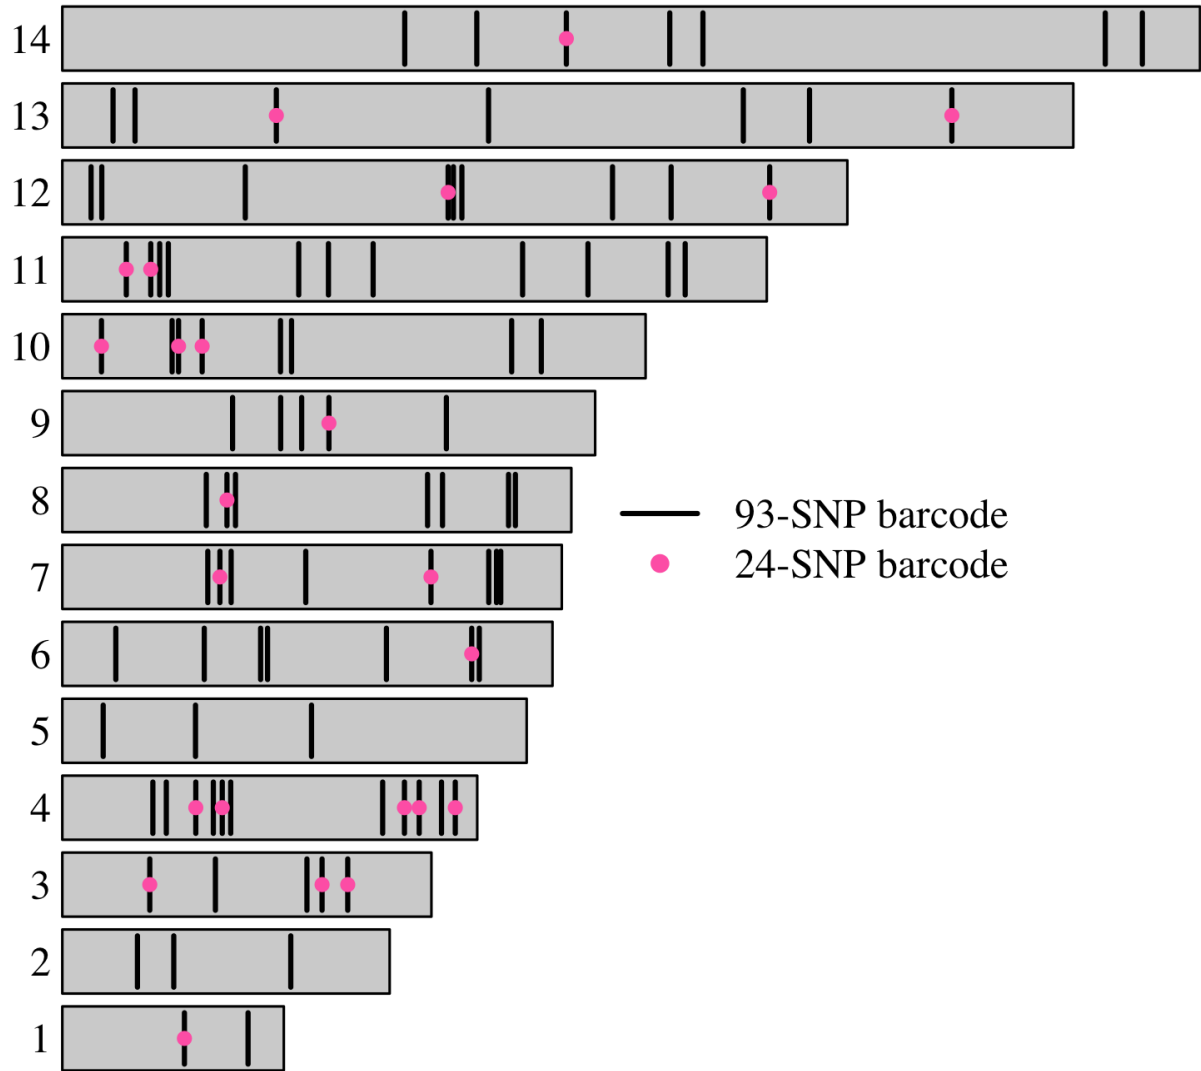

Figure A: 93 and 24-SNP barcode positions over 14 extit{P. falciparum} chromosomes.

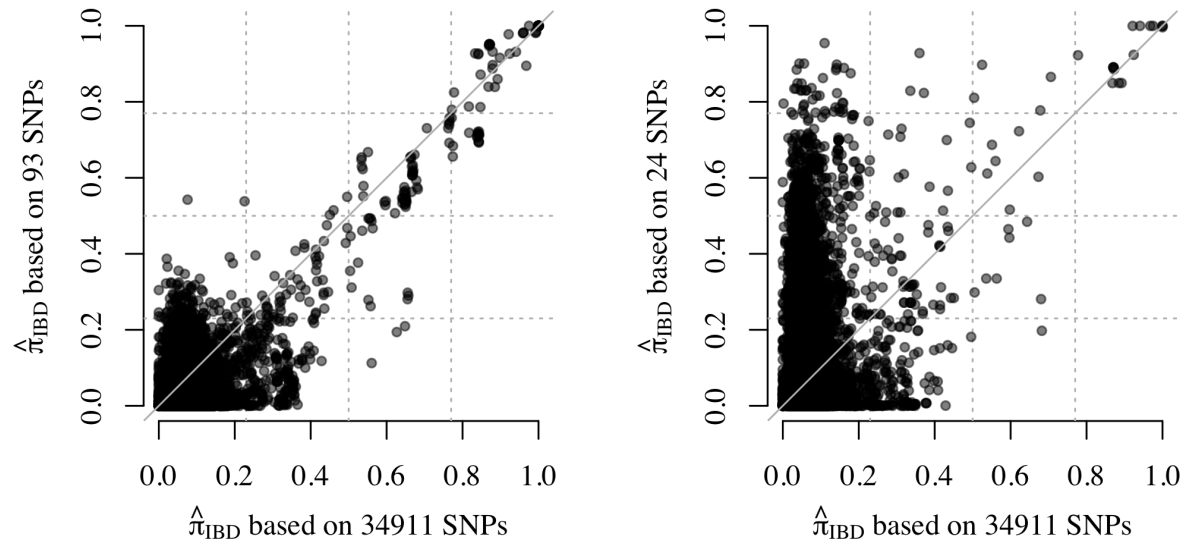

Figure B: Comparison between  $\hat{\pi}_{\text{IBD}}$  based on the whole genome and 93 and 24 SNP subsets generated using 2001-2014 WGS data.

## Dependence between barcode SNPs under hmmIBD

To capture dependence between SNPs as a function of inter-SNP distance  $d_t$  (in base pairs), the hidden Markov model underpinning hmmIBD (see Appendix S1 of Schaffner et al., n.d. for full details) includes a matrix whose elements are probabilities of switching between IBD and not IBD states at successive SNPs, denoted here by  $\text{SNP}_{t-1}$  and  $\text{SNP}_t$ ,

$$\begin{aligned} \mathbf{A}(t) &= \begin{bmatrix} \mathbb{P}(\text{SNP}_t = \text{IBD} \mid \text{SNP}_{t-1} = \text{IBD}) & \mathbb{P}(\text{SNP}_t = \text{not IBD} \mid \text{SNP}_{t-1} = \text{IBD}) \\ \mathbb{P}(\text{SNP}_t = \text{IBD} \mid \text{SNP}_{t-1} = \text{not IBD}) & \mathbb{P}(\text{SNP}_t = \text{not IBD} \mid \text{SNP}_{t-1} = \text{not IBD}) \end{bmatrix}, \\ &= \begin{bmatrix} 1 - \pi_2(1 - e^{-k\rho d_t}) & \pi_2(1 - e^{-k\rho d_t}) \\ \pi_1(1 - e^{-k\rho d_t}) & 1 - \pi_1(1 - e^{-k\rho d_t}) \end{bmatrix}, \end{aligned}$$

where  $\pi_1$  and  $\pi_2 = 1 - \pi_1$  are the expected fraction IBD and not IBD, respectively ( $\pi_1$  is inferred under the model, and is the output of interest, denoted  $\hat{\pi}_{\text{IBD}}$ , in the current study);  $\rho$  is the recombination rate; and  $k$  is the number of generations since the most recent common ancestor. Both  $\rho$  and  $k$  are considered fixed across the genome. Akin to  $\pi_1$ ,  $k$  is inferred under the model. When distances are large the exponential term tends to zero. That is,  $\lim_{d_t \rightarrow \infty} e^{-k\rho d_t} = 0$ , such that

$$\begin{aligned} \lim_{d_t \rightarrow \infty} \mathbf{A}(t) &= \begin{bmatrix} 1 - \pi_2 & \pi_2 \\ \pi_1 & 1 - \pi_1 \end{bmatrix}, \\ &= \begin{bmatrix} \mathbb{P}(\text{SNP}_t = \text{IBD}) & \mathbb{P}(\text{SNP}_t = \text{not IBD}) \\ \mathbb{P}(\text{SNP}_t = \text{IBD}) & \mathbb{P}(\text{SNP}_t = \text{not IBD}) \end{bmatrix}. \end{aligned}$$

In other words, when distances are sufficiently large that  $e^{-k\rho d_t} \approx 0$ , SNPs are effectively independent of one another. Fig C shows that for  $\rho = 7.4 \times 10^{-7}$  base pairs per Morgan (Miles et al. 2016), and small numbers of generations,  $k < 50$ ,  $e^{-k\rho d_t} \neq 0$  for most distances between barcode SNPs. That is to say, barcode SNPs are dependent under hmmIBD providing  $k$  is small because  $\rho$  is low.

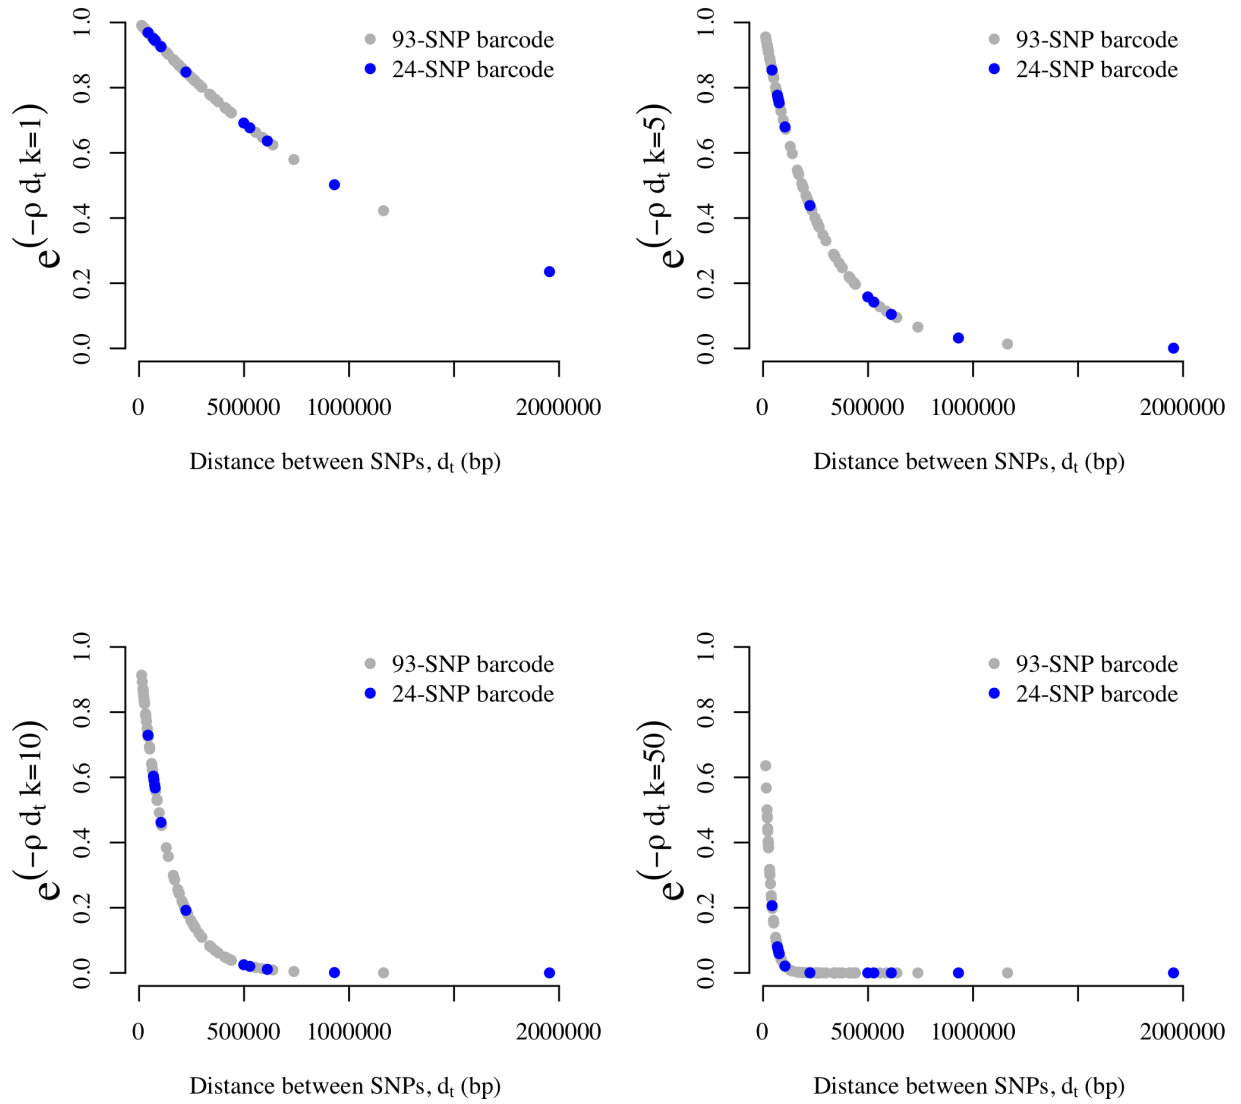

Figure C: The effect of inter-93 and 24 barcode SNP distances on  $\exp(-\rho d_i k)$  given different numbers of generations,  $k$ .

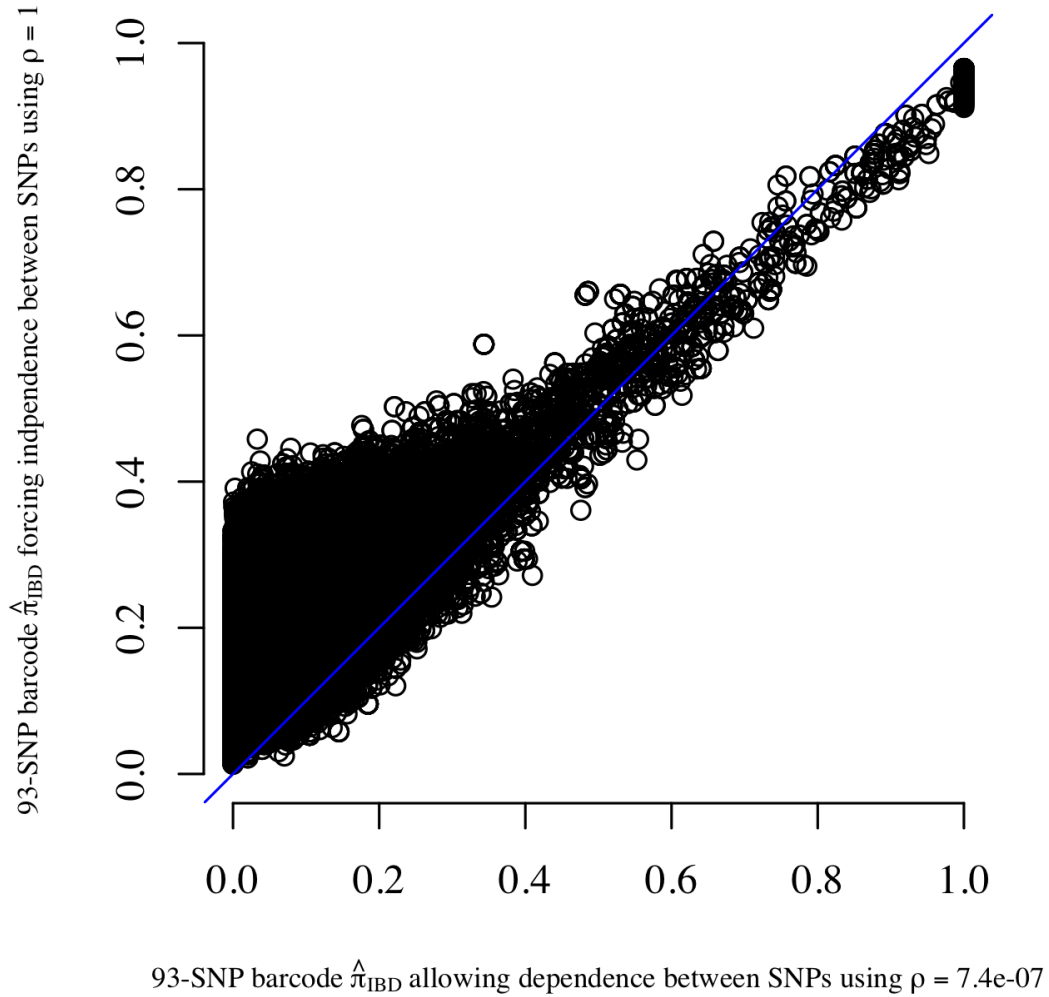

Figure D: IBD proportion estimates generated under hmmIBD both allowing dependence and forcing independence between SNPs by varying  $\rho$ .

## References

Miles, Alistair, Zamin Iqbal, Paul Vauterin, Richard Pearson, Susana Campino, Michel Theron, Kelda Gould, et al. 2016. “Indels, structural variation and recombination drive genomic diversity in *Plasmodium falciparum*.” *Genome Research* 26 (9): 1288–99.

Schaffner, Stephen F, Aimee R Taylor, Wesley Wong, F Dyann, and Daniel E Neafsey. n.d. “hmmIBD: software to infer pairwise identity by descent between haploid genotypes; 2017. Preprint. Available from: bioRxiv doi: 10.1101/188078. Cited 4 October 2017.”
